# Supplementary material
Source: Springer Nature journal article supplement (https://www.springermedizin.de/resource/supplementary/12913_2013_3015_MOESM4_ESM.pdf/9533298)
Supplement: MOESM4 [file 9533298]

| Appendix 1. Search Terms Used in Medline and CINAHL |                                                                                                                                                                                                                                                                                          |                            |                           |
|-----------------------------------------------------|------------------------------------------------------------------------------------------------------------------------------------------------------------------------------------------------------------------------------------------------------------------------------------------|----------------------------|---------------------------|
| Group Number                                        | Search Terms                                                                                                                                                                                                                                                                             | Number of Articles Medline | Number of Articles CINAHL |
| Group 1                                             | Nurse Practitioners OR<br>Physician Assistants OR<br>Nurse Midwives                                                                                                                                                                                                                      | 22,644                     | 3,779                     |
| Group 2                                             | "Counseling"[Mesh:noexp] OR<br>"Nurse's Role"[Mesh] OR<br>"Preventive Health Services"[Mesh] OR<br>"Patient Acceptance of Health Care"[Mesh] OR<br>"Patient Education as Topic"[Mesh] OR<br>"Health Knowledge, Attitudes, Practice"[Mesh]                                                | 576,608                    | 9,166                     |
| Group 3                                             | "Diet"[Mesh] OR<br>"Exercise"[Mesh] OR<br>"Motor Activity"[Mesh] OR<br>"Tobacco Use Cessation"[Mesh]                                                                                                                                                                                     | 335,235                    | 52,213                    |
| Group 4                                             | "Early Detection of Cancer"[Mesh] OR<br>"Vaginal Smears"[Mesh] OR<br>"Mammography"[Mesh] OR<br>"Breast Neoplasms/prevention and control"[Majr:noexp] OR<br>"Colorectal Neoplasms/prevention and control"[Majr:noexp] OR<br>"Mass Screening"[Mesh] OR<br>"Papillomavirus Vaccines" [Mesh] | 132,489                    | 4,199                     |
|                                                     | Group 1 and Group 2 and (Group 3 or Group 4)                                                                                                                                                                                                                                             | 573                        | 21                        |

Limits: Humans, Journal Article, English, Publication Date from 1990/01/01 to 2011/12/31
